# Supplementary material for: Microbubbles-Assisted Ultrasound Triggers the Release of Extracellular Vesicles
Source: MDPI journal article supplement (doi:10.3390/ijms18081610), 2017-07-25
Supplement: s1 [file s1]

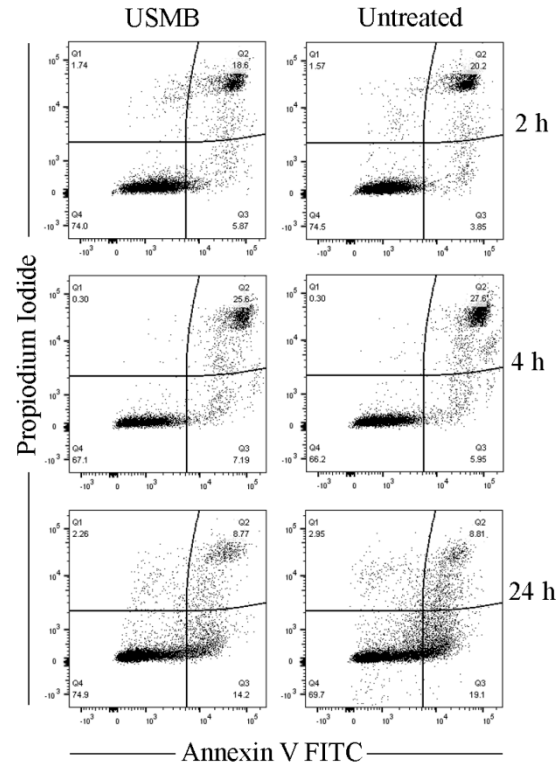

**Figure S1.** Double staining of annexin V fluorescein isothiocyanate (FITC) and propidium iodide on microbubbles-assisted ultrasound (USMB)-treated and untreated cells harvested at 2, 4, and 24 h.

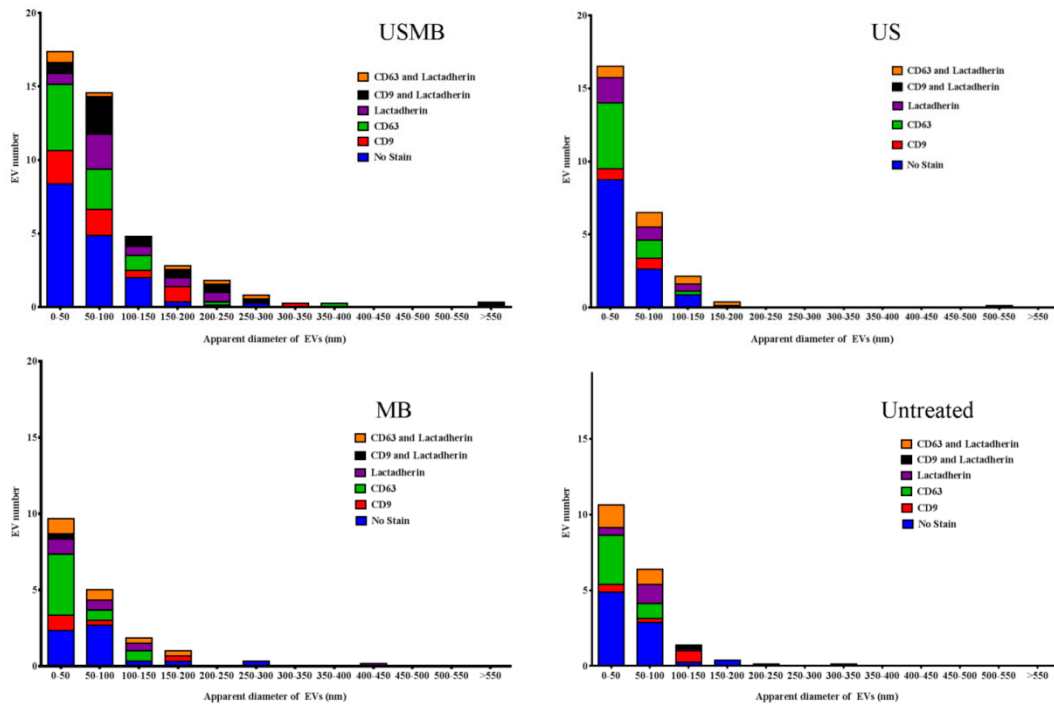

**Figure S2.** Size distribution of EVs exposing CD9, CD63, and/or lactadherin. These EVs were derived from the conditioned media collected at 4 h after microbubbles-assisted ultrasound (USMB), ultrasound (US) or microbubbles (MB) treatment only, and untreated. Surface area of EVs was

measured using ImageJ [20] to calculate the apparent diameter of EV (nm). Bin size is 50 nm. EV numbers were calculated from the mean of four independent experiments.

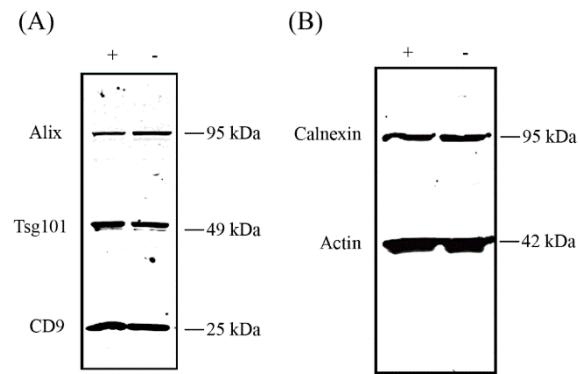

**Figure S3.** Western blotting on total cell lysates prepared from microbubbles-assisted ultrasound (USMB)-treated (+) and untreated (-) FaDu cells collected at 4 h-time point. For western blotting, equal protein amounts of cell lysates were loaded (8.8  $\mu$ g of total proteins). Detection of the proteins was by using antibodies alix, tsg101, CD9, calnexin, and actin. Presence of alix (95 kDa), tsg101 (49 kDa), and CD9 (25 kDa) are shown (A). Calnexin (95 kDa) and actin (42 kDa) are present in both cell and EV lysates (B).

**Table S1.** Antibodies used in bead capture assay, western blotting, and immunogold electron microscopy.

| Name                                          | Clone      | Dilution    | Manufacturer                                            | Application                           |
|-----------------------------------------------|------------|-------------|---------------------------------------------------------|---------------------------------------|
| Alexa Fluor 647 mouse anti-human CD9 antibody | MEM-61     | 1:200       | EXBIO Antibodies, Vestec, Czech Republic                | Bead capture assay                    |
| Alexa Fluor 647 mouse anti-human CD63         | H5C6       | 1:200       | BD Pharmingen, San Jose, CA, USA                        | Bead capture assay                    |
| Alexa Fluor 647 mouse IgG1κ isotype control   | MOPC-21    | 1:200       | BD Pharmingen                                           | Bead capture assay                    |
| Mouse anti-human alix antibody                | 3A9        | 1:1000      | Abcam, Cambridge, UK                                    | Western blotting                      |
| Mouse anti-human actin                        | JLA20      | 1:1000      | Merck Millipore, Amsterdam, The Netherlands             | Western blotting                      |
| Rabbit anti-human histone 2B                  | Polyclonal | 1:1000      | Abcam                                                   | Western blotting                      |
| Rabbit anti-human CD9                         | EPR2949    | 1:2000      | Abcam                                                   | Western blotting                      |
| Rabbit anti-human tsg101                      | Polyclonal | 1:1000      | Abcam                                                   | Western blotting                      |
| Rabbit anti-human Calnexin antibody           | Polyclonal | 1:1000      | GeneTex, Irvine, CA, USA                                | Western blotting                      |
| Mouse anti-human CD63 antibody                | MEM-259    | 1:600, 1:10 | Abcam                                                   | Western blotting, electron microscopy |
| Alexa 680 goat anti-mouse                     |            | 1:10,000    | Thermo Fisher Scientific, Rockford, IL, USA             | Secondary antibody, western blotting  |
| Alexa 680 goat anti-rabbit (biotin)           |            | 1:10,000    | Thermo Fisher Scientific                                | Secondary antibody, western blotting  |
| Mouse anti-human CD9                          | M-L13      | 1:50        | BD Pharmingen                                           | Primary antibody, electron microscopy |
| Lactadherin FITC                              |            | 1:20        | Haematologic Technologies Inc., Essex Junction, VT, USA | Electron microscopy                   |
| Mouse IgG1 isotype control                    | X40        | 1:50        | BD Biosciences, San Jose, CA, USA                       | Electron microscopy                   |
| Goat anti-mouse IgG 6 nm                      |            | 1:50        | Aurion, Wageningen, The Netherlands                     | Electron microscopy                   |
| Mouse anti-FITC 10 nm                         |            | 1:20        | Aurion                                                  | Electron microscopy                   |
